# Supplementary material for: Day-to-day progression of vital-sign circadian rhythms in the intensive care unit
Source: Springer Nature journal article supplement (doi:10.1186/s13054-021-03574-w), 2021-04-22

## ADDITIONAL FILE 3

# Day-to-day progression of vital-sign circadian rhythms in the intensive care unit

Shaun Davidson<sup>1\*</sup>, Mauricio Villarroel<sup>1</sup>, Mirae Harford<sup>1,2</sup>, Eoin Finnegan<sup>1</sup>, João Jorge<sup>1</sup>, Duncan Young<sup>2</sup>, Peter Watkinson<sup>2</sup> and Lionel Tarassenko<sup>1</sup>

\*Correspondence:

shaun.davidson@eng.ox.ac.uk

<sup>1</sup>Institute of Biomedical Engineering, Department of Engineering Science, University of Oxford, Oxford, UK  
Full list of author information is available at the end of the article

## Diagnoses and medication

Figs. 1 - 3 show the 20 most common ICD-9 (MIMIC-III and eICU-CRD) or ICRNARC (PICRAM) codes in the combined SRV and DCS patient cohort. The frequency of occurrence of these codes is represented as the % of patients in each of the SRV and DCS cohorts where a given ICD-9 or ICRNARC code was present. Only the top 3 ICD-9 or ICRNARC codes per patient were used, to minimise overlapping similar codes being repeatedly counted for a single patient. There are, as one might expect, some notable differences between the databases and between the SRV and DCS cohorts within each databases. However, there is a reasonable degree of overlap in ICD-9 and ICRNARC codes between the SRV and DCS cohorts for a given database.

Figs. 4 - 6 show the 20 most common medications administered at least once during an ICU stay in the combined SRV and DCS cohorts in the MIMIC-III, eICU-CRD, and PICRAM databases, respectively. The frequency of occurrence of these medications is represented as the % of patients in each of the SRV and DCS cohorts where a given medication was administered at least once. There are some notable differences in medication administered between databases, but in general the SRV and DCS cohorts for a given database had similar distributions of administered medication, with more medication administered to the DCS cohort.

### Author details

<sup>1</sup>Institute of Biomedical Engineering, Department of Engineering Science, University of Oxford, Oxford, UK.

<sup>2</sup>Critical Care Research Group, Nuffield Department of Clinical Neurosciences, University of Oxford, Oxford, UK.

### References

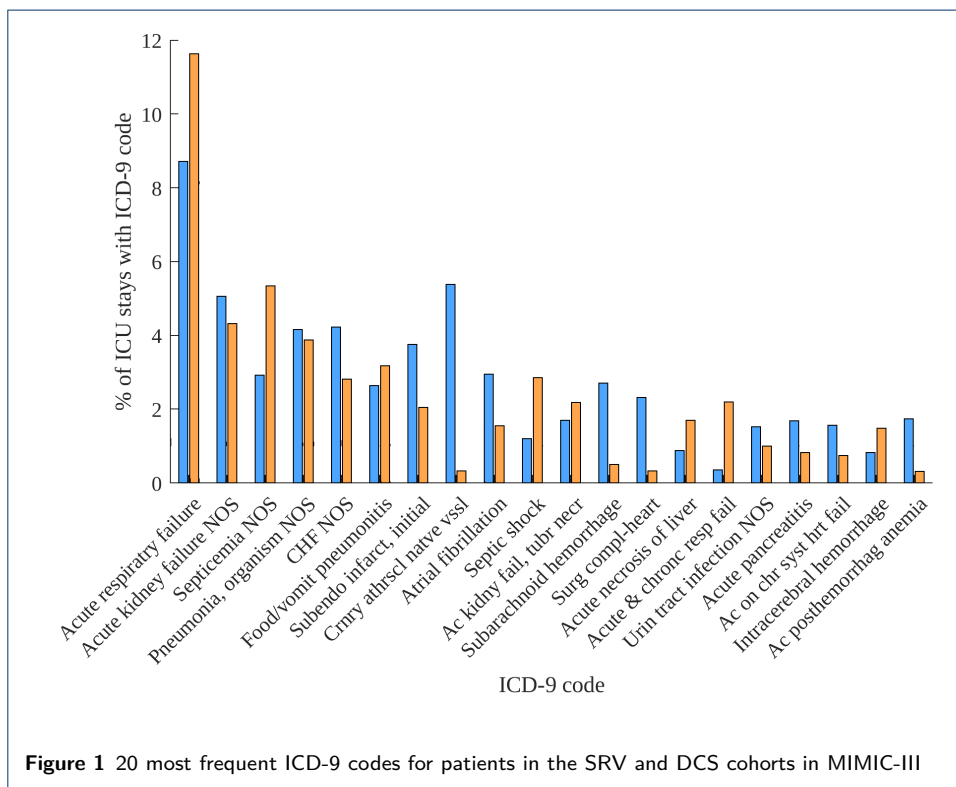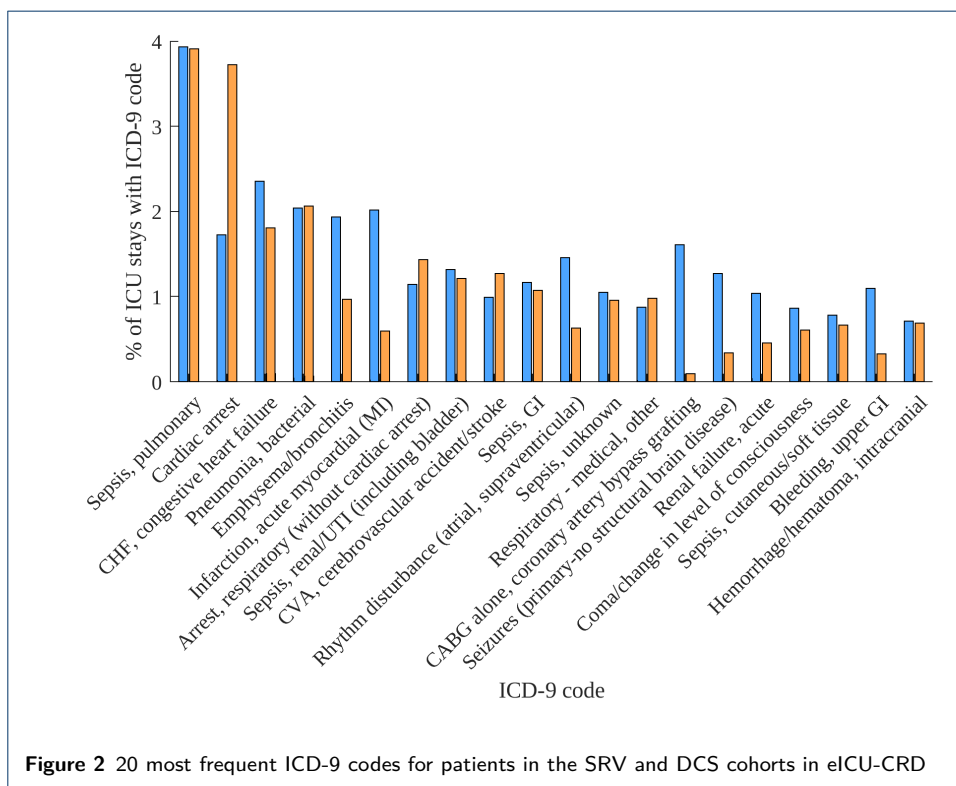

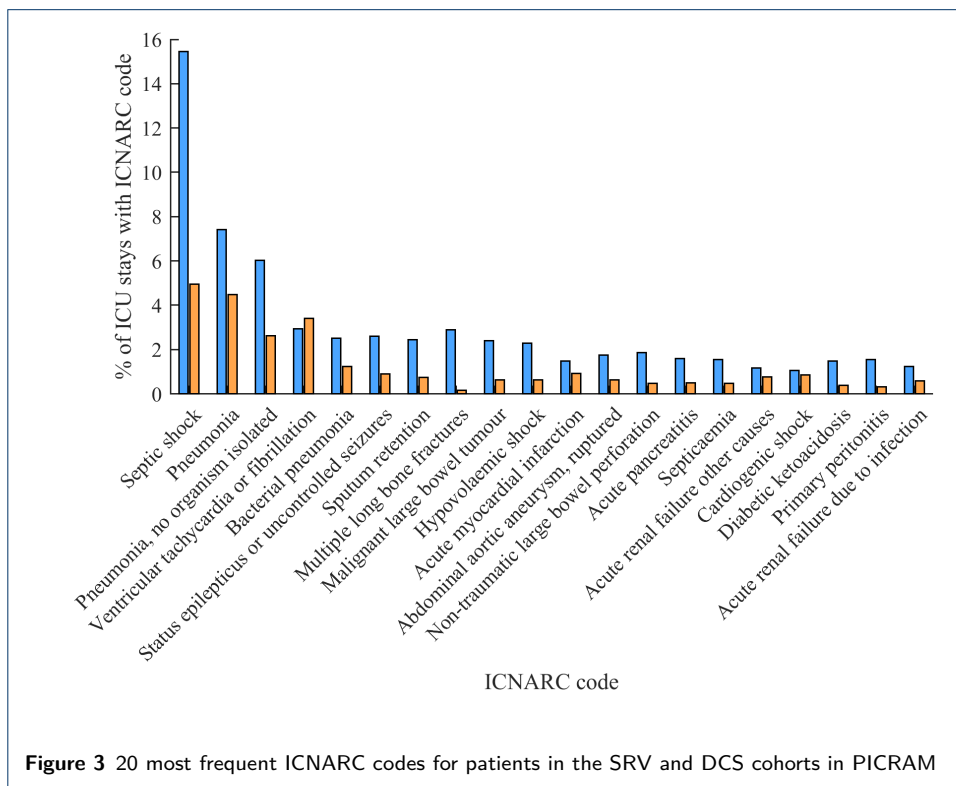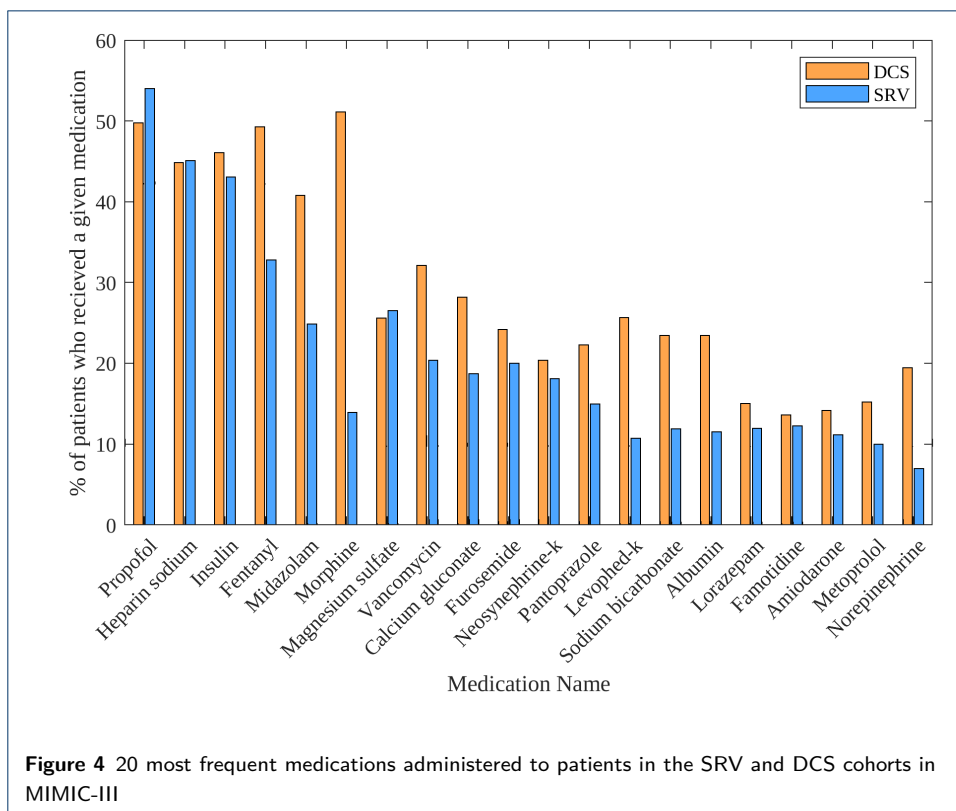

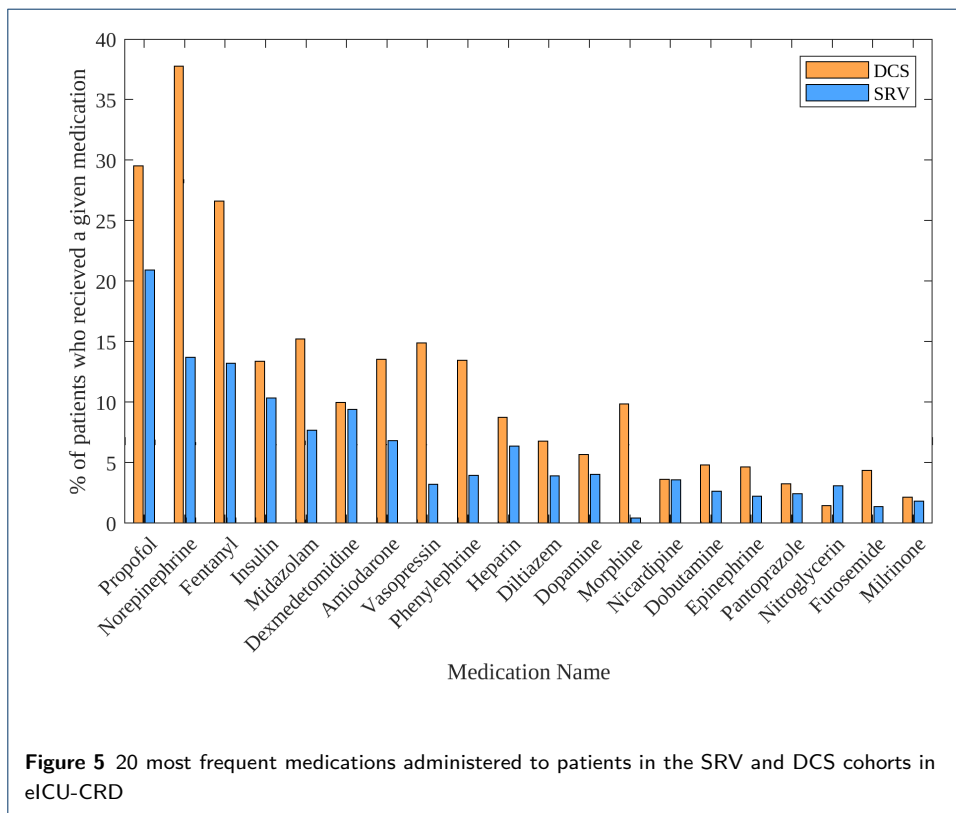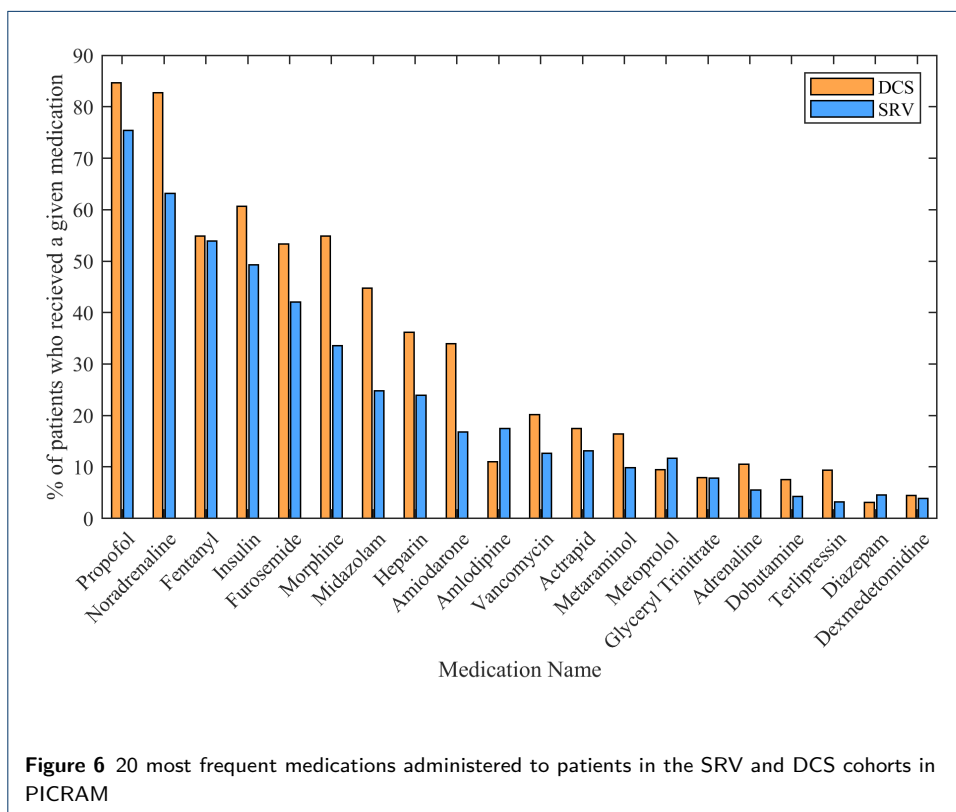

Supplement: MOESM3 [file 19095326]
