# Supplementary material for: Day-to-day progression of vital-sign circadian rhythms in the intensive care unit
Source: Springer Nature journal article supplement (doi:10.1186/s13054-021-03574-w), 2021-04-22
Supplement: MOESM1 [file 19095326]

## ADDITIONAL FILE 1

# Day-to-day progression of vital-sign circadian rhythms in the intensive care unit

Shaun Davidson<sup>1\*</sup>, Mauricio Villarroel<sup>1</sup>, Mirae Harford<sup>1,2</sup>, Eoin Finnegan<sup>1</sup>, João Jorge<sup>1</sup>, Duncan Young<sup>2</sup>, Peter Watkinson<sup>2</sup> and Lionel Tarassenko<sup>1</sup>

\*Correspondence:

shaun.davidson@eng.ox.ac.uk

<sup>1</sup>Institute of Biomedical

Engineering, Department of

Engineering Science, University of

Oxford, Oxford, UK

Full list of author information is available at the end of the article

### Measurements and ICU stays that met selection criteria

Tables 1 - 6 show the number of patients (#Pat.), hospital admissions (#Hosp.), ICU stays (#ICU), and vital-sign measurements (#SBP, #HR, #RR, #Temp.) that satisfied the cumulative application of the SRV and DCS selection criteria previously described for each database.

**Table 1** The number of patients, hospital admissions, ICU stays, and vital-sign measurements in MIMIC-III that matched each cohort SRV selection criteria.

| Subset             | #Pat.  | #Hosp. | #ICU   | #SBP      | #HR       | #RR       | #Temp.    |
|--------------------|--------|--------|--------|-----------|-----------|-----------|-----------|
| All                | 46,476 | 57,786 | 61,532 | 2,871,980 | 7,936,326 | 6,520,159 | 1,128,747 |
| 1. Cuff SBP        | 37,671 | 48,033 | 51,392 | 2,871,980 | 6,168,906 | 6,433,882 | 1,114,487 |
| 2. Survived        | 33,483 | 42,604 | 45,217 | 2,455,896 | 4,991,389 | 5,158,016 | 915,228   |
| 3. Disch. Home     | 20,376 | 24,308 | 25,169 | 986,392   | 1,774,032 | 1,778,552 | 322,043   |
| 4. No DNR/DNI      | 20,212 | 24,039 | 24,888 | 970,349   | 1,736,234 | 1,740,712 | 318,767   |
| 5. Stay 96h+       | 3,286  | 3,487  | 3,536  | 333,569   | 682,601   | 686,253   | 130,367   |
| 6. Valid Meas.     | 3,286  | 3,487  | 3,536  | 332,520   | 682,450   | 683,303   | 129,592   |
| 7. BP Medication   | 3,286  | 3,487  | 3,536  | 215,234   | 364,161   | 683,303   | 129,592   |
| 8. Day/Night BP    | 2,721  | 2,863  | 2,901  | 212,111   | 336,880   | 571,738   | 104,986   |
| 9. No Repeat Stays | 2,639  | 2,706  | 2,706  | 193,078   | 311,272   | 530,103   | 97,402    |
| 10. Hourly Avr.    | 2,639  | 2,706  | 2,706  | 179,712   | 270,994   | 433,752   | 61,872    |

**Table 2** The number of patients, hospital admissions, ICU stays, and vital-sign measurements in MIMIC-III that matched each cohort DCS selection criteria.

| Subset             | #Pat.  | #Hosp. | #ICU   | #SBP      | #HR       | #RR       | #Temp.    |
|--------------------|--------|--------|--------|-----------|-----------|-----------|-----------|
| All                | 46,476 | 57,786 | 61,532 | 2,871,980 | 7,936,326 | 6,520,159 | 1,128,747 |
| 1. Cuff SBP        | 37,671 | 48,033 | 51,392 | 2,871,980 | 6,168,906 | 6,433,882 | 1,114,487 |
| 2. None            | 37,671 | 48,033 | 51,392 | 2,871,980 | 6,168,906 | 6,433,882 | 1,114,487 |
| 3. Died or Hospice | 5,965  | 5,976  | 6,787  | 456,837   | 1,240,489 | 1,339,866 | 210,958   |
| 4. None            | 5,965  | 5,976  | 6,787  | 456,837   | 1,240,489 | 1,339,866 | 210,958   |
| 5. Stay 96h+       | 2,769  | 2,769  | 2,944  | 341,240   | 1,039,203 | 1,136,356 | 180,363   |
| 6. Valid Meas.     | 2,769  | 2,769  | 2,943  | 338,334   | 1,037,625 | 1,124,765 | 179,063   |
| 7. BP Medication   | 2,769  | 2,769  | 2,943  | 188,473   | 453,219   | 1,124,765 | 179,063   |
| 8. Day/Night BP    | 1,885  | 1,885  | 1,992  | 184,206   | 397,580   | 857,624   | 125,849   |
| 9. No Repeat Stays | 1,885  | 1,885  | 1,885  | 171,468   | 376,759   | 823,804   | 119,405   |
| 10. Hourly Avr.    | 1,885  | 1,885  | 1,885  | 157,993   | 283,971   | 512,544   | 77,597    |

**Table 3** The number of patients, hospital admissions, ICU stays, and vital-sign measurements in eICU-CRD that matched each cohort SRV selection criteria.

| Subset             | #Pat.   | #Hosp.  | #ICU    | #SBP       | #HR         | #RR         | #Temp.     |
|--------------------|---------|---------|---------|------------|-------------|-------------|------------|
| All                | 139,367 | 166,355 | 200,859 | 22,079,437 | 146,070,343 | 128,586,418 | 13,267,119 |
| 1. Cuff SBP        | 127,486 | 151,397 | 176,497 | 20,666,164 | 135,849,528 | 119,354,199 | 12,444,242 |
| 2. Survived        | 116,598 | 138,226 | 160,825 | 17,370,839 | 117,960,824 | 103,466,212 | 9,673,554  |
| 3. Disch. Home     | 78,489  | 89,120  | 101,953 | 8,119,745  | 57,392,933  | 49,471,570  | 3,637,550  |
| 4. No DNR/DNI      | 74,679  | 84,478  | 96,452  | 7,460,215  | 53,032,738  | 45,605,571  | 3,387,661  |
| 5. Stay 96h+       | 9,310   | 9,662   | 9,954   | 2,569,047  | 19,348,095  | 16,576,641  | 1,762,256  |
| 6. Valid Meas.     | 9,310   | 9,662   | 9,954   | 2,564,469  | 19,345,816  | 16,393,269  | 1,737,881  |
| 7. BP Medication   | 9,310   | 9,662   | 9,954   | 1,416,440  | 10,115,899  | 16,393,269  | 1,737,881  |
| 8. Day/Night BP    | 6,579   | 6,763   | 6,941   | 1,404,184  | 9,946,620   | 11,544,226  | 1,300,971  |
| 9. No Repeat Stays | 5,378   | 5,510   | 5,510   | 1,109,117  | 7,786,988   | 9,084,524   | 1,071,181  |
| 10. Hourly Avr.    | 5,378   | 5,510   | 5,510   | 577,468    | 665,471     | 783,445     | 91,618     |

**Table 4** The number of patients, hospital admissions, ICU stays, and vital-sign measurements in eICU-CRD that matched each cohort DCS selection criteria.

| Subset             | #Pat.   | #Hosp.  | #ICU    | #SBP       | #HR         | #RR         | #Temp.     |
|--------------------|---------|---------|---------|------------|-------------|-------------|------------|
| All                | 139,367 | 166,355 | 200,859 | 22,079,437 | 146,070,343 | 128,586,418 | 13,267,119 |
| 1. Cuff SBP        | 127,486 | 151,397 | 176,497 | 20,666,164 | 135,849,528 | 119,354,199 | 12,444,242 |
| 2. None            | 127,486 | 151,397 | 176,497 | 20,666,164 | 135,849,528 | 119,354,199 | 12,444,242 |
| 3. Died or Hospice | 13,160  | 13,171  | 15,672  | 3,295,325  | 17,888,704  | 15,887,987  | 2,770,688  |
| 4. None            | 13,160  | 13,171  | 15,672  | 3,295,325  | 17,888,704  | 15,887,987  | 2,770,688  |
| 5. Stay 96h+       | 4,608   | 4,611   | 4,930   | 2,393,594  | 13,536,442  | 11,959,833  | 2,099,621  |
| 6. Valid Meas.     | 4,608   | 4,611   | 4,930   | 2,382,638  | 13,527,642  | 11,687,852  | 2,037,847  |
| 7. BP Medication   | 4,608   | 4,611   | 4,930   | 1,418,442  | 6,880,215   | 11,687,837  | 2,037,832  |
| 8. Day/Night BP    | 3,149   | 3,150   | 3,355   | 1,410,379  | 6,697,799   | 8,164,832   | 1,522,290  |
| 9. No Repeat Stays | 3,149   | 3,150   | 3,150   | 1,233,678  | 6,303,657   | 7,685,515   | 1,457,804  |
| 10. Hourly Avr.    | 3,149   | 3,150   | 3,150   | 453,234    | 533,443     | 658,644     | 123,818    |

**Table 5** The number of patients, hospital admissions, ICU stays, and vital-sign measurements in PICRAM that matched each cohort SRV selection criteria.

| Subset             | #Pat.  | #Hosp. | #ICU   | #SBP    | #HR       | #RR       | #Temp.  |
|--------------------|--------|--------|--------|---------|-----------|-----------|---------|
| All                | 12,290 | 13,138 | 13,949 | 334,120 | 1,295,070 | 1,306,271 | 346,474 |
| 1. Cuff SBP        | 11,351 | 12,113 | 12,845 | 334,120 | 1,265,862 | 1,277,367 | 341,646 |
| 2. Survived        | 10,034 | 10,736 | 11,382 | 291,376 | 1,033,072 | 1,042,400 | 287,620 |
| 3. Disch. Home     | 7,823  | 8,249  | 8,724  | 195,253 | 716,926   | 717,929   | 200,002 |
| 4. No DNR/DNI      | 7,731  | 8,149  | 8,613  | 188,800 | 694,441   | 695,583   | 195,635 |
| 5. Stay 96h+       | 2,012  | 2,061  | 2,154  | 127,148 | 494,530   | 498,006   | 133,674 |
| 6. Valid Meas.     | 2,012  | 2,061  | 2,154  | 126,676 | 494,117   | 497,458   | 132,926 |
| 7. BP Medication   | 2,012  | 2,061  | 2,154  | 114,694 | 374,972   | 497,458   | 132,926 |
| 8. Day/Night BP    | 2,012  | 2,061  | 2,154  | 114,694 | 374,972   | 497,458   | 132,926 |
| 9. No Repeat Stays | 1,917  | 1,937  | 1,938  | 101,156 | 333,322   | 443,084   | 117,840 |
| 10. Hourly Avr.    | 1,917  | 1,937  | 1,938  | 99,153  | 326,866   | 431,829   | 116,989 |

**Table 6** The number of patients, hospital admissions, ICU stays, and vital-sign measurements in PICRAM that matched each cohort DCS selection criteria.

| Subset             | #Pat.  | #Hosp. | #ICU   | #SBP    | #HR       | #RR       | #Temperature |
|--------------------|--------|--------|--------|---------|-----------|-----------|--------------|
| All                | 12,290 | 13,138 | 13,949 | 334,120 | 1,295,070 | 1,306,271 | 346,474      |
| 1. Cuff SBP        | 11,351 | 12,113 | 12,845 | 334,120 | 1,265,862 | 1,277,367 | 341,646      |
| 2. None            | 11,351 | 12,113 | 12,845 | 334,120 | 1,265,862 | 1,277,367 | 341,646      |
| 3. Died or Hospice | 1,566  | 1,566  | 1,567  | 37,207  | 214,618   | 216,683   | 46,990       |
| 4. None            | 1,566  | 1,566  | 1,567  | 37,207  | 214,618   | 216,683   | 46,990       |
| 5. Stay 96h+       | 653    | 653    | 653    | 31,268  | 182,851   | 185,968   | 38,924       |
| 6. Valid Meas.     | 653    | 653    | 653    | 31,065  | 182,582   | 185,716   | 38,329       |
| 7. BP Medication   | 653    | 653    | 653    | 23,905  | 102,197   | 185,716   | 38,329       |
| 8. Day/Night BP    | 653    | 653    | 653    | 23,905  | 102,197   | 185,716   | 38,329       |
| 9. No Repeat Stays | 653    | 653    | 653    | 23,905  | 102,197   | 185,716   | 38,329       |
| 10. Hourly Avr.    | 653    | 653    | 653    | 23,218  | 99,387    | 176,379   | 37,976       |

**Author details**

<sup>1</sup>Institute of Biomedical Engineering, Department of Engineering Science, University of Oxford, Oxford, UK.

<sup>2</sup>Critical Care Research Group, Nuffield Department of Clinical Neurosciences, University of Oxford, Oxford, UK.

**References**
